# Supplementary material for: Construction of an oxidative phosphorylation-related gene signature for predicting prognosis and identifying immune infiltration in osteosarcoma
Source: Aging (Albany NY). 2024 Mar 20;16(6):5311–35. doi: 10.18632/aging.205650 (PMC11006489; doi:10.18632/aging.205650)
Supplement: Supplementary Figures [file aging-16-205650-s001.pdf]

## SUPPLEMENTARY FIGURES

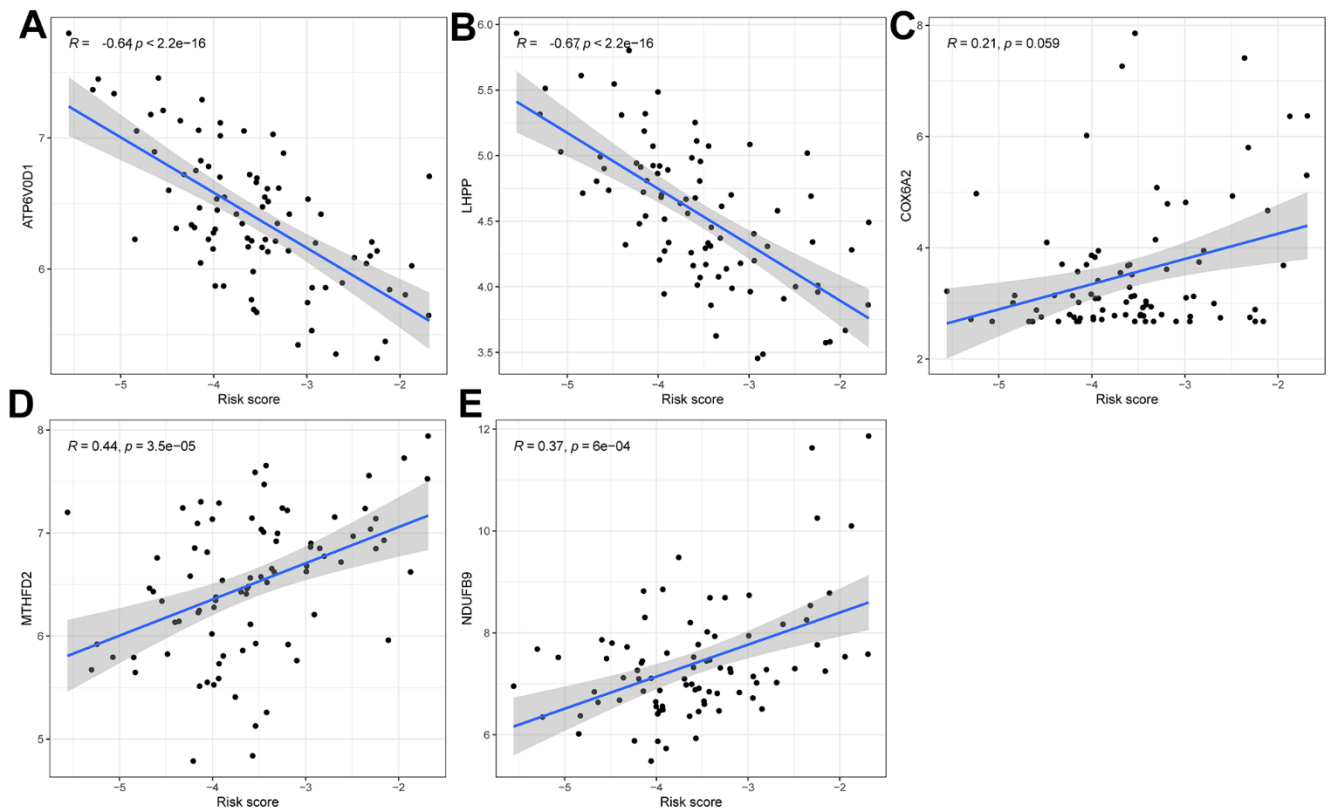

**Supplementary Figure 1. Correlation analysis between 5 genes and risk score in TARGET data.** (A–E) The correlation coefficients between ATP6V0D1, LHPP, COX6A2, MTHFD2, and NDUF9 in TARGET osteosarcoma data and risk scores, respectively.

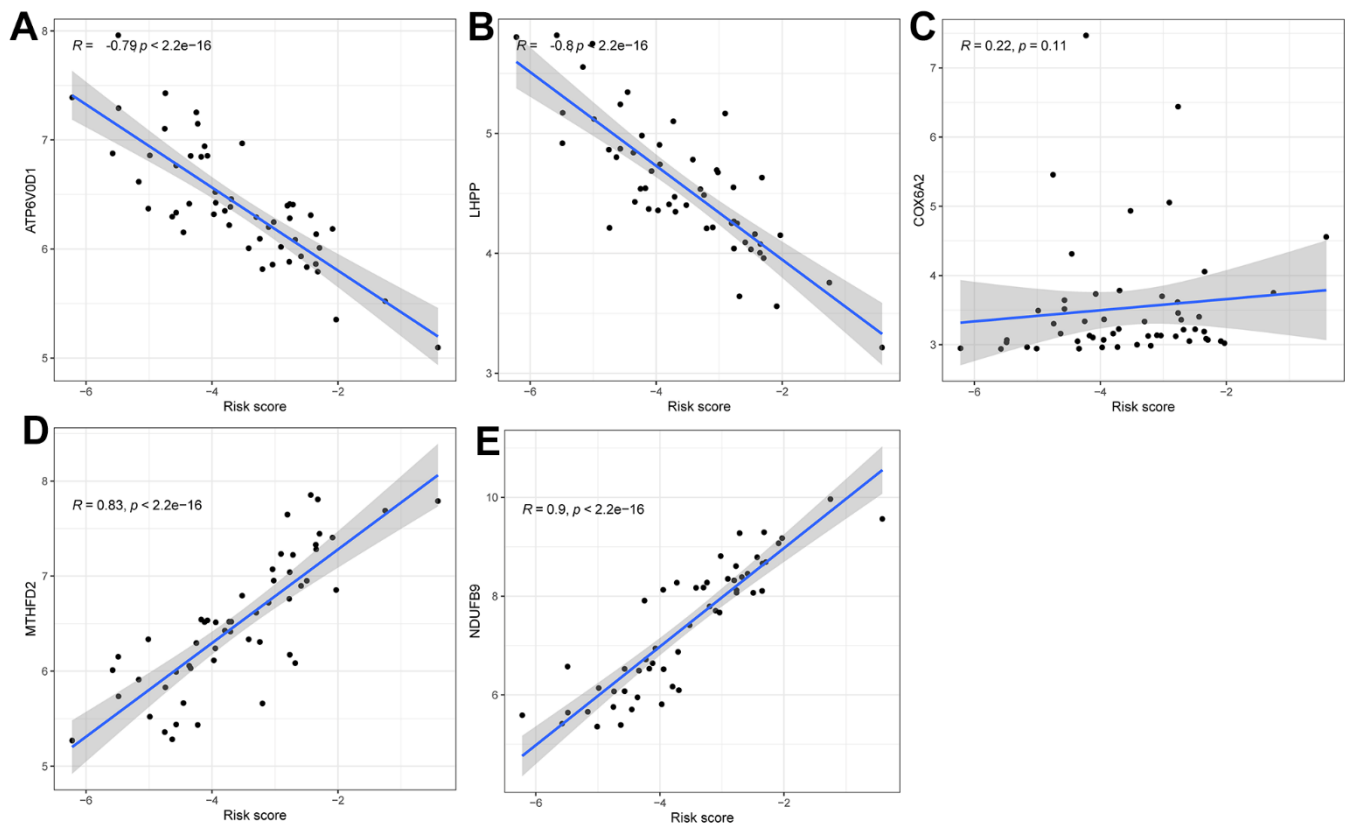

**Supplementary Figure 2. Correlation analysis between 5 genes and risk score in GSE21257 dataset.** (A–E) The correlation coefficients between ATP6V0D1, LHPP, COX6A2, MTHFD2, and NDUFB9 in the GSE21257 dataset and risk scores, respectively.

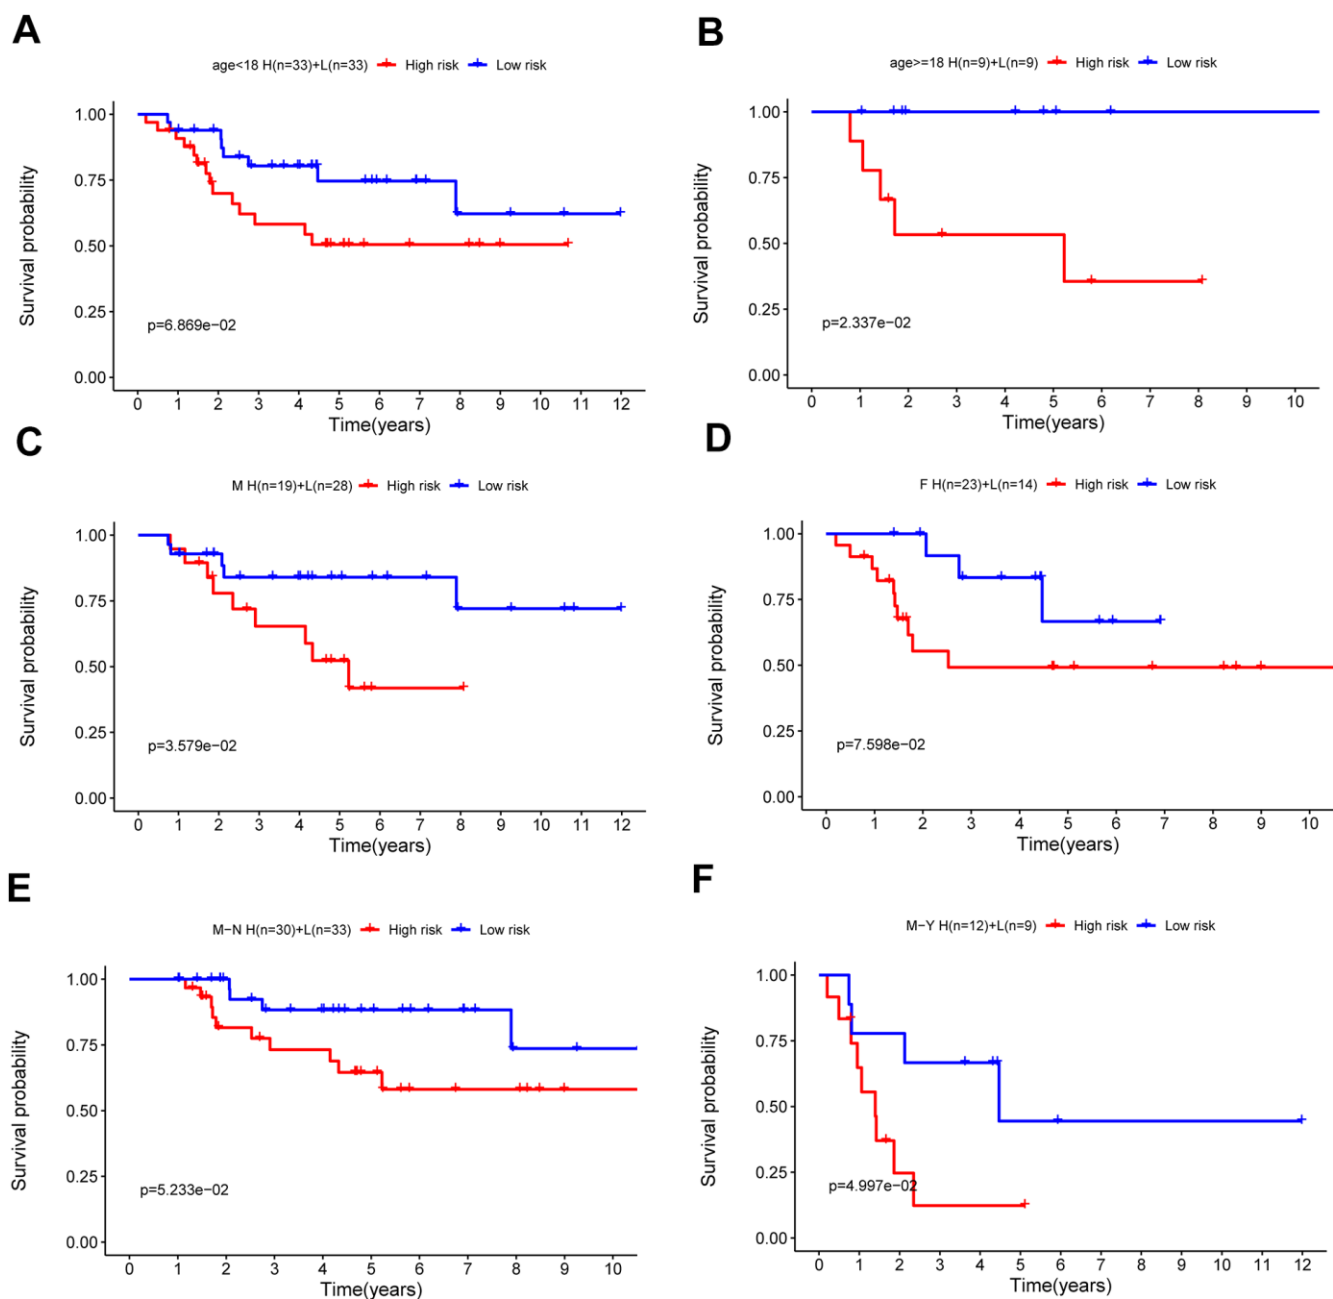

**Supplementary Figure 3. TCGA clinical subgroup survival analysis of the risk score of osteosarcoma oxidative phosphorylation genes.** The results of the risk-scoring model in the training group were <18 (A) male (B) nonmetastatic (C) ≥18 (D) female (E) and metastatic (F) subgroups.

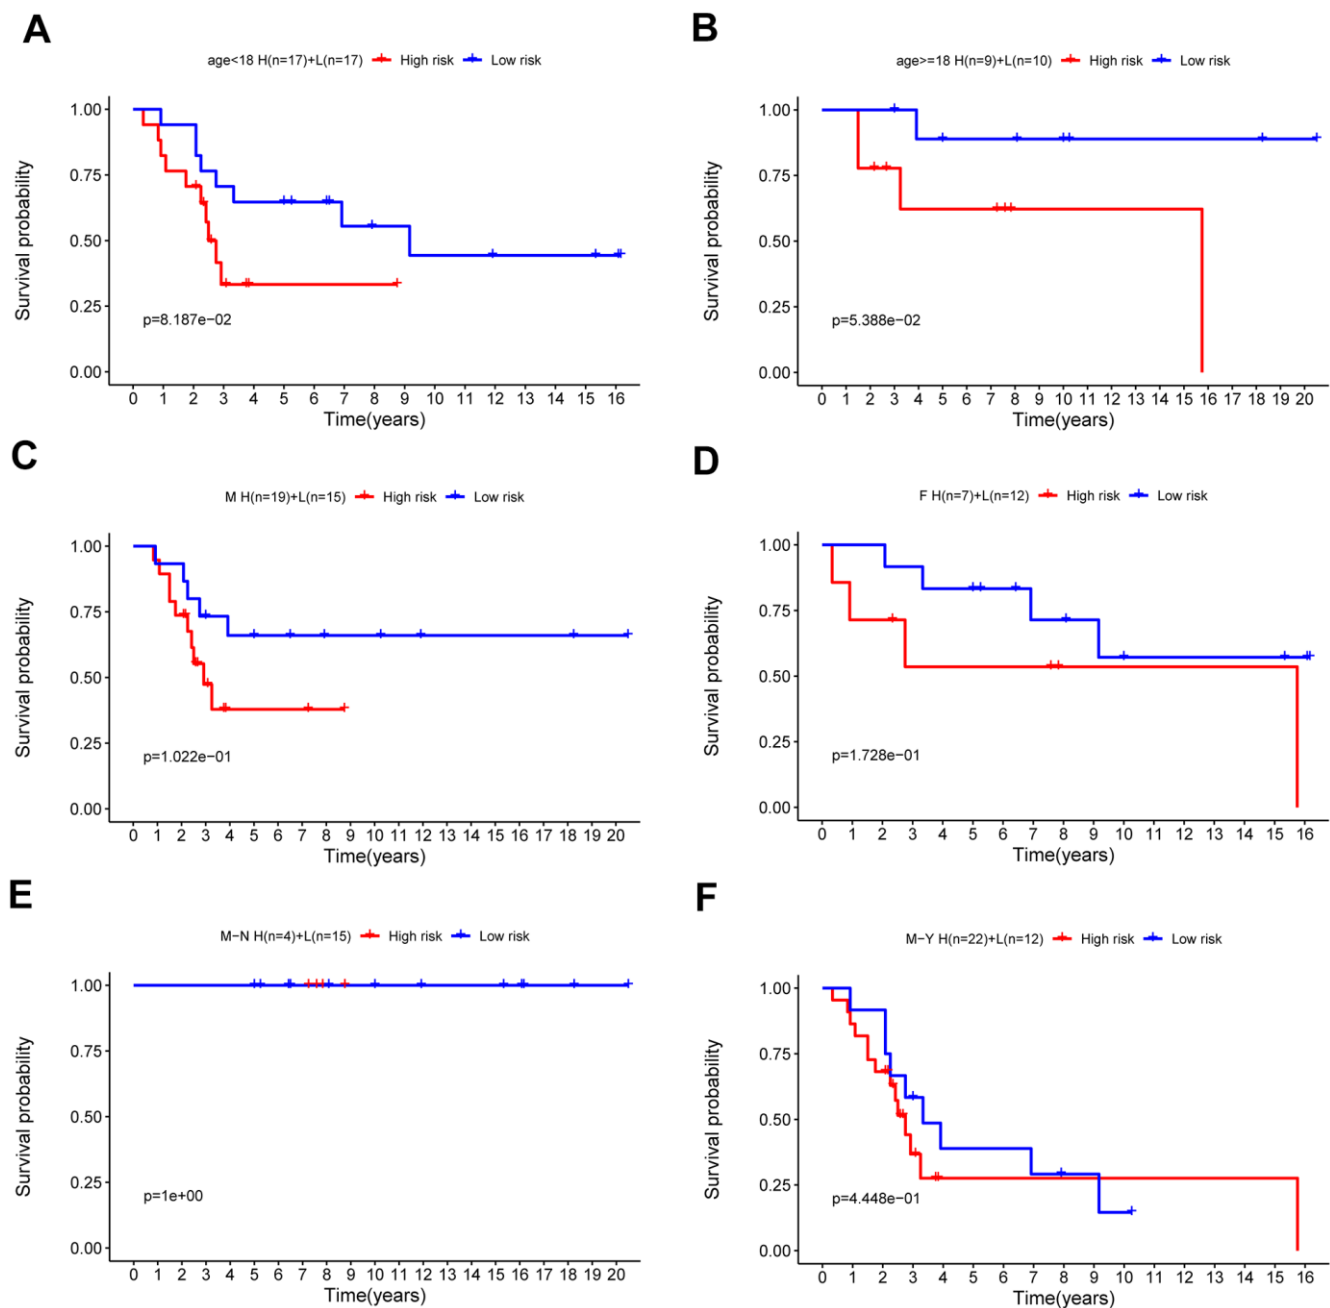

**Supplementary Figure 4. GSE21257 clinical subgroup survival analysis of the risk score of osteosarcoma oxidative phosphorylation genes.** The results of the risk-scoring model in the validation group were <18 (A), male (B), nonmetastatic (C), ≥18 (D), female (E), and metastatic (F) subgroups.

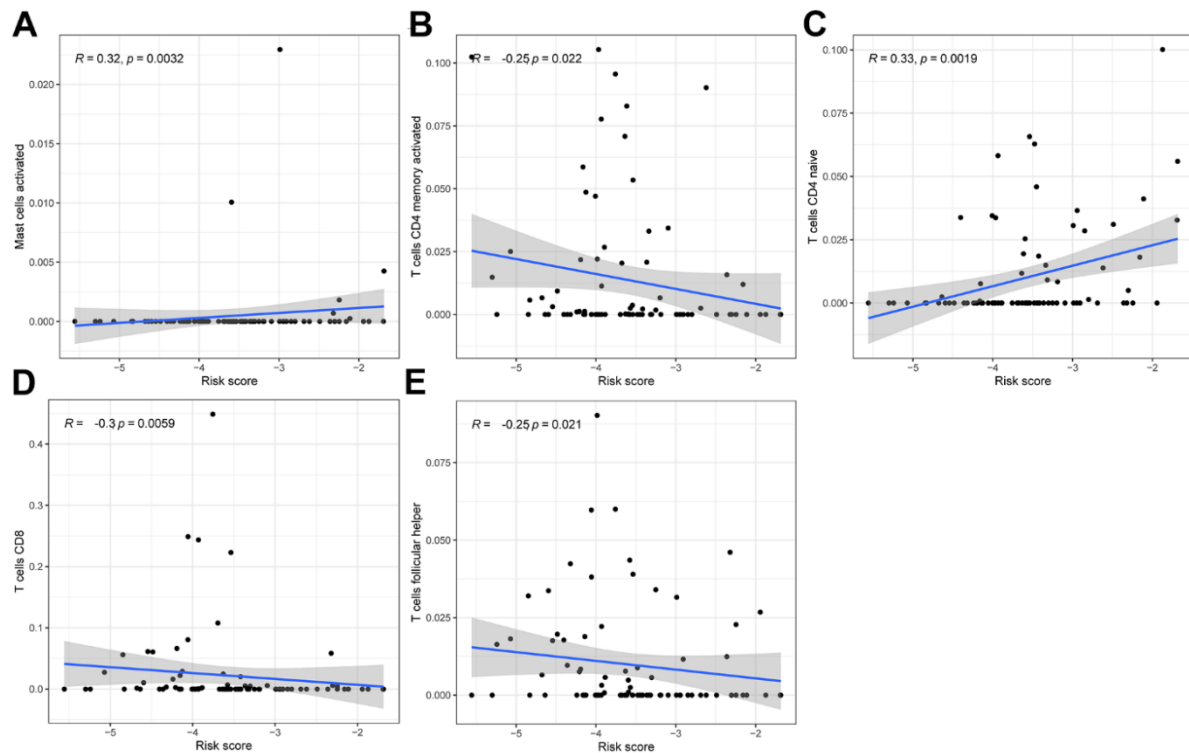

**Supplementary Figure 5. Correlation analysis between risk score and immune cells.** (A–E) The correlation coefficients between risk score and Mast cells activated, T cells CD4 memory activated, T cells CD4 naïve, T cells CD8 and T cells follicular helper, respectively.

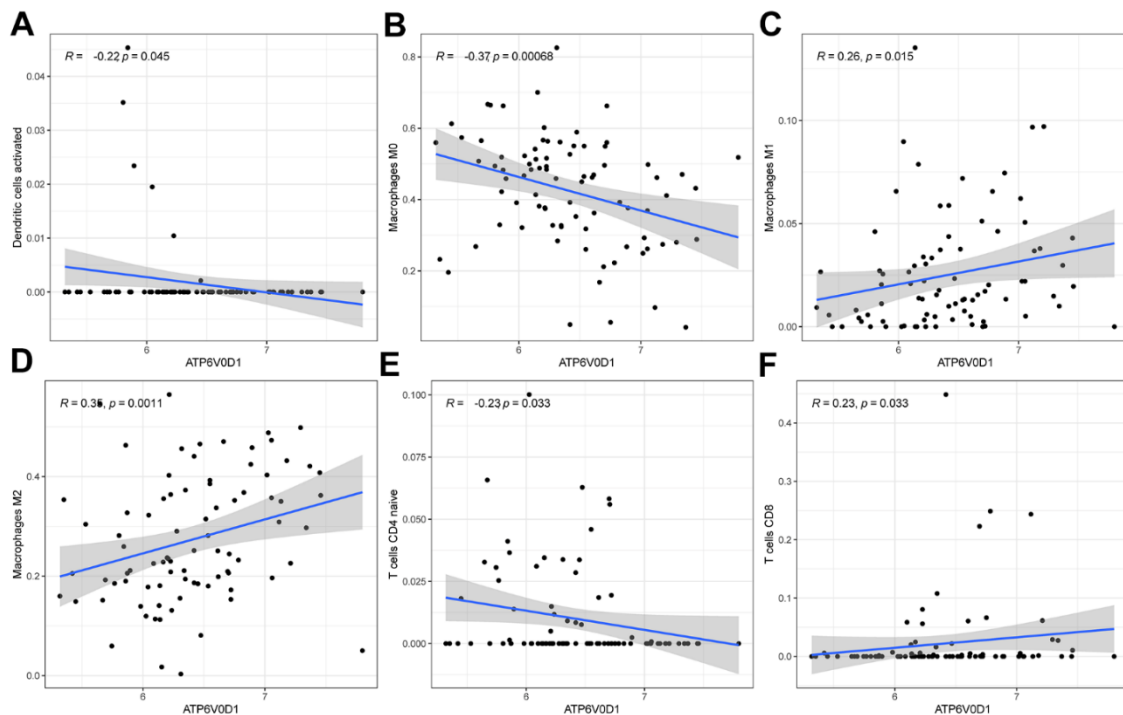

**Supplementary Figure 6. Correlation analysis between ATP6V0D1 gene expression and immune cells.** (A–F) The correlation coefficients between ATP6V0D1 and Dendritic cells activated, Macrophages M0, Macrophages M1, Macrophages M2, T cells CD4 naïve and T cells CD8, respectively.

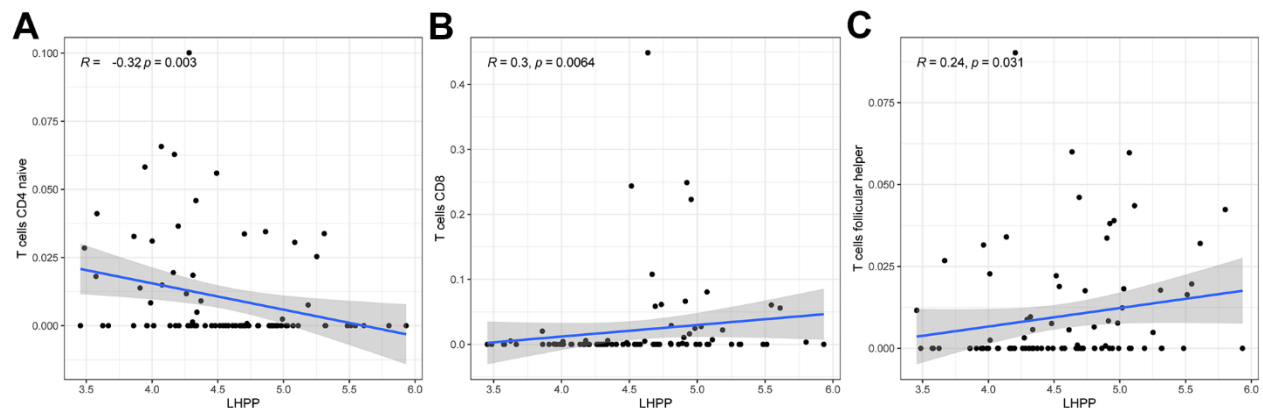

**Supplementary Figure 7. Correlation analysis between LHPP gene expression and immune cells.** (A–C) The correlation coefficients between LHPP and T cells CD4 naïve, T cells CD8 and T cells follicular helper, respectively.

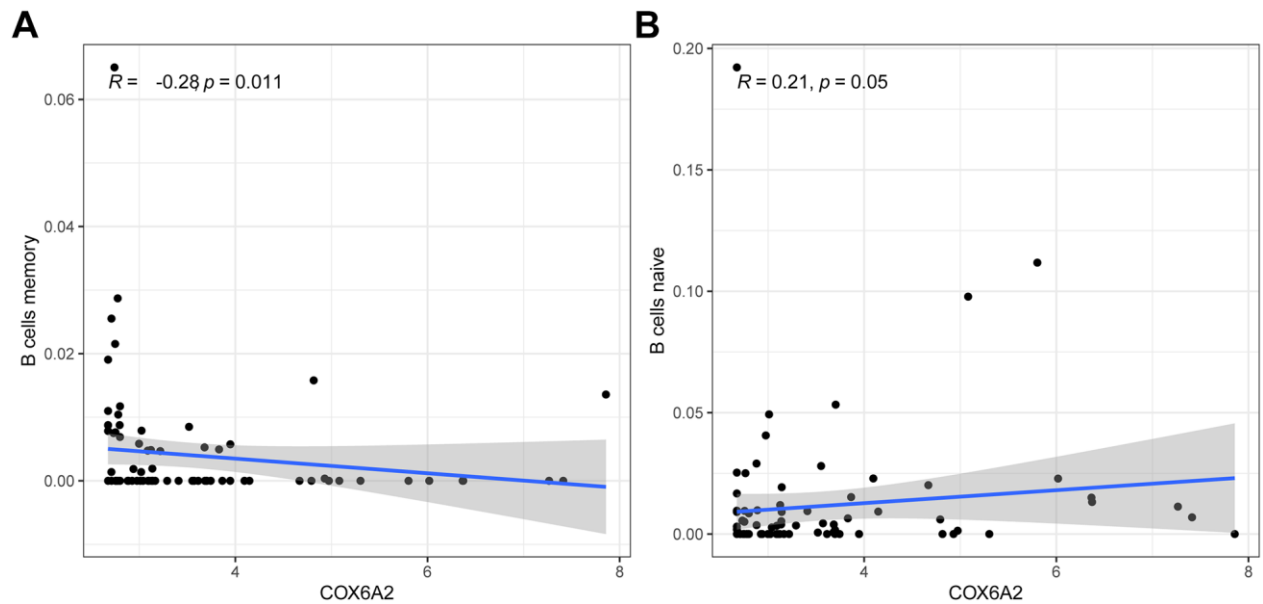

**Supplementary Figure 8. Correlation analysis between COX6A2 gene expression and immune cells.** (A, B) The correlation coefficients between COX6A2 and B cells memory and B cells naïve, respectively.

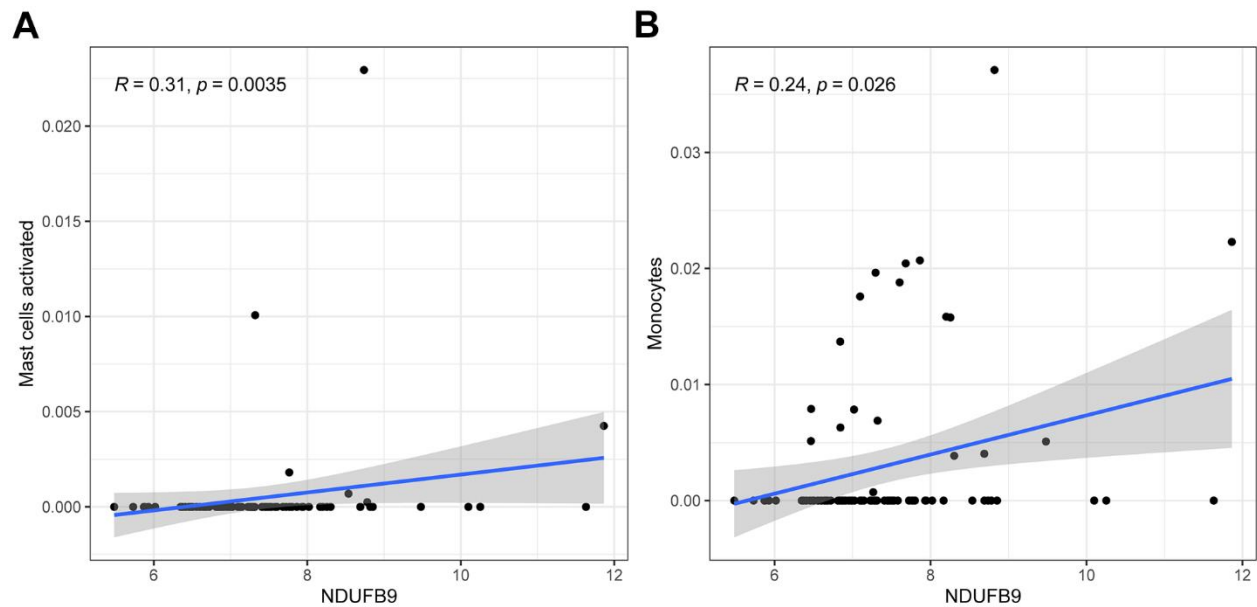

**Supplementary Figure 9. Correlation analysis between NDUFB9 gene expression and immune cells.** (A, B) The correlation coefficients between NDUFB9 and Mast cells activated and Monocytes, respectively.

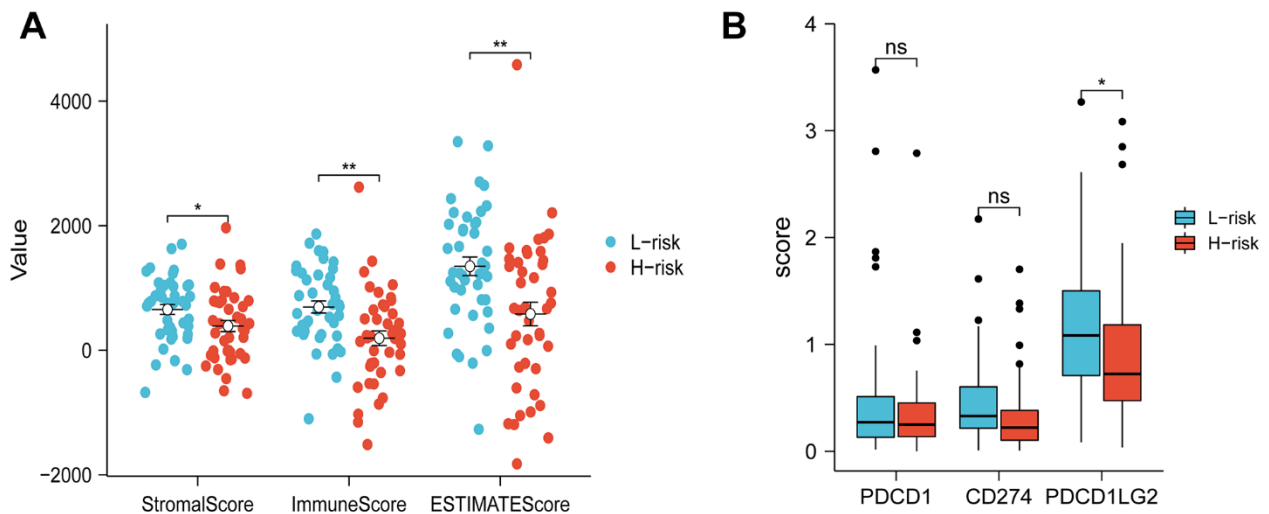

**Supplementary Figure 10. Results of immunity analysis.** (A) Differences in matrix scores, immune scores, and ESTIMATE scores between the low-risk group and the high-risk group. (B) The difference in the expression of PDCD1, CD274, and PDCD1LG2 between the low-risk group and the high-risk group. (\*,  $p < 0.05$ , \*\*,  $p < 0.01$ , \*\*\*,  $p < 0.001$ ).

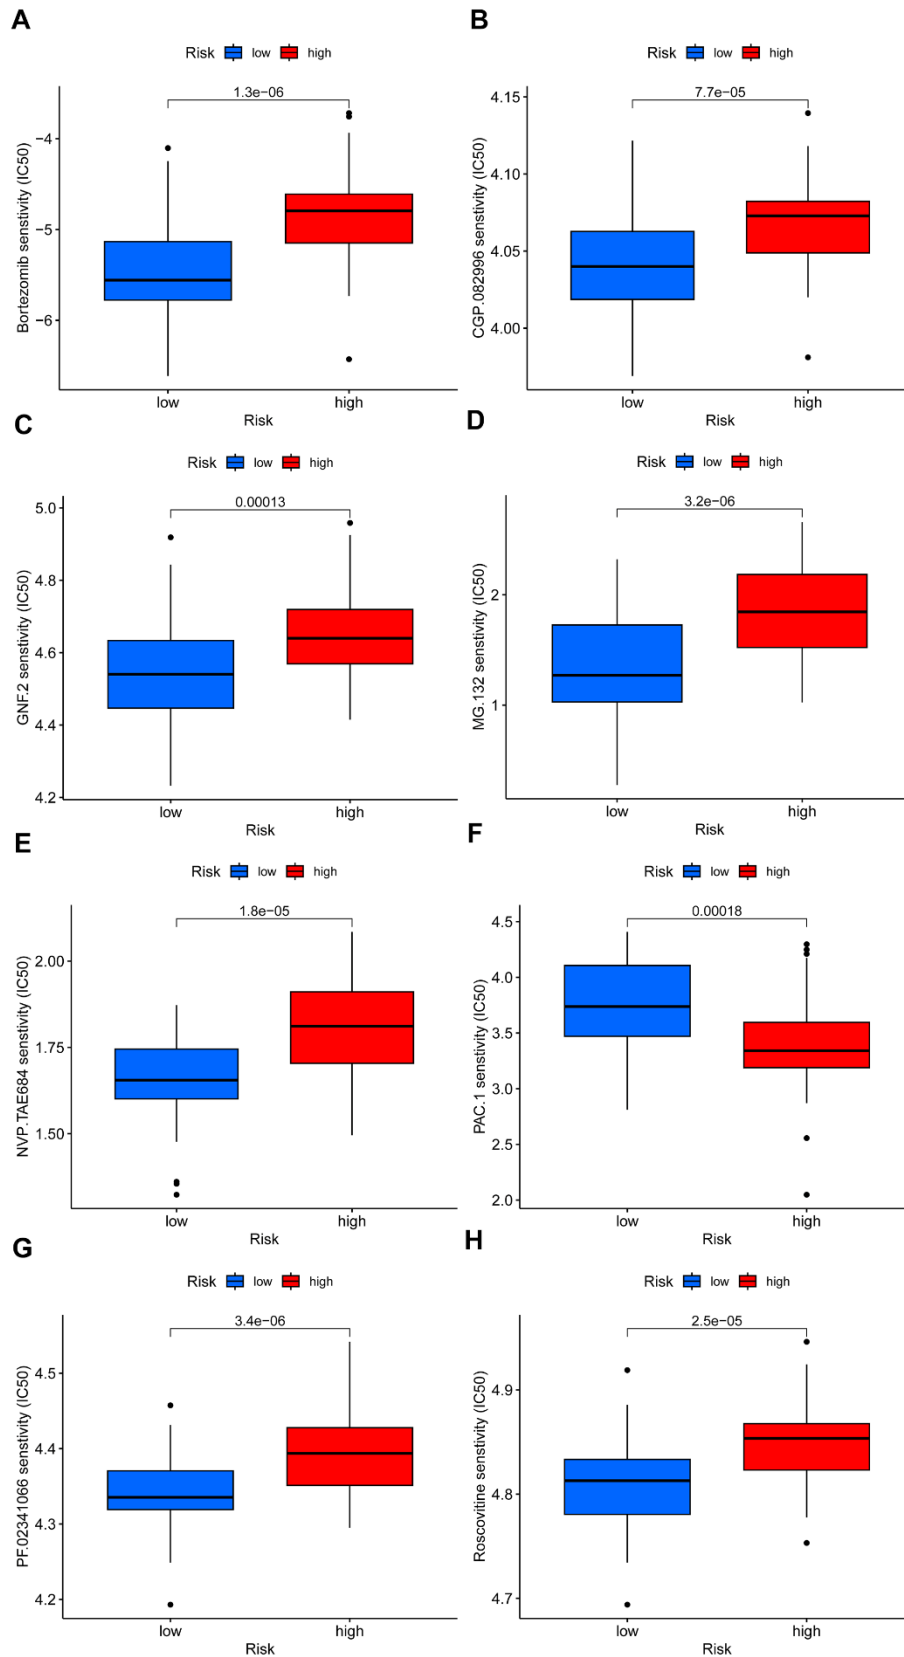

**Supplementary Figure 11. Results of drug sensitivity analysis.** (A) Bortezomib ( $p = 1.3 \times 10^{-6}$ ). (B) CGP.082996 ( $p = 7.7 \times 10^{-5}$ ). (C) GNF.2 ( $p = 0.00013$ ). (D) MG.132 ( $p = 3.2 \times 10^{-6}$ ). (E) NVP.TAE684 ( $p = 1.8 \times 10^{-5}$ ). (F) PAC.1 ( $p = 0.00018$ ). (G) PF. 02341066 (clozotinib) ( $p = 3.4 \times 10^{-6}$ ). (H) Roscovitine ( $p = 2.5 \times 10^{-5}$ ).

**A**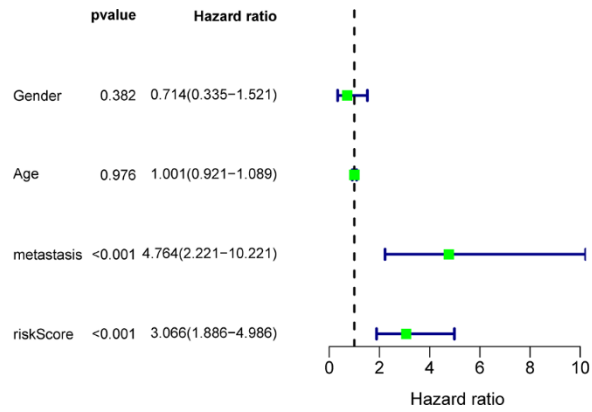**B**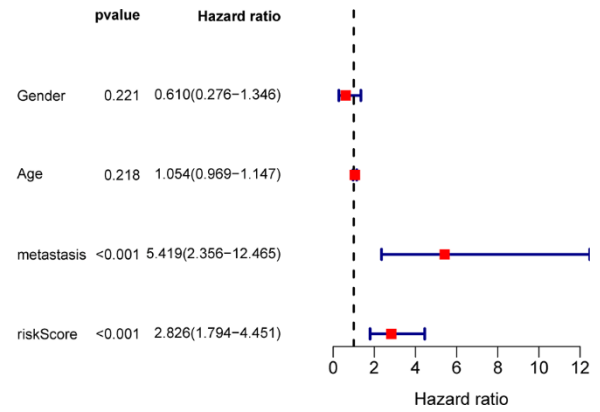

**Supplementary Figure 12. Evaluation of clinical data and risk score for prognosis of osteosarcoma.** (A) Results of single factor Cox analysis of TCGA osteosarcoma data. (B) Multivariate Cox analysis of TCGA osteosarcoma data.

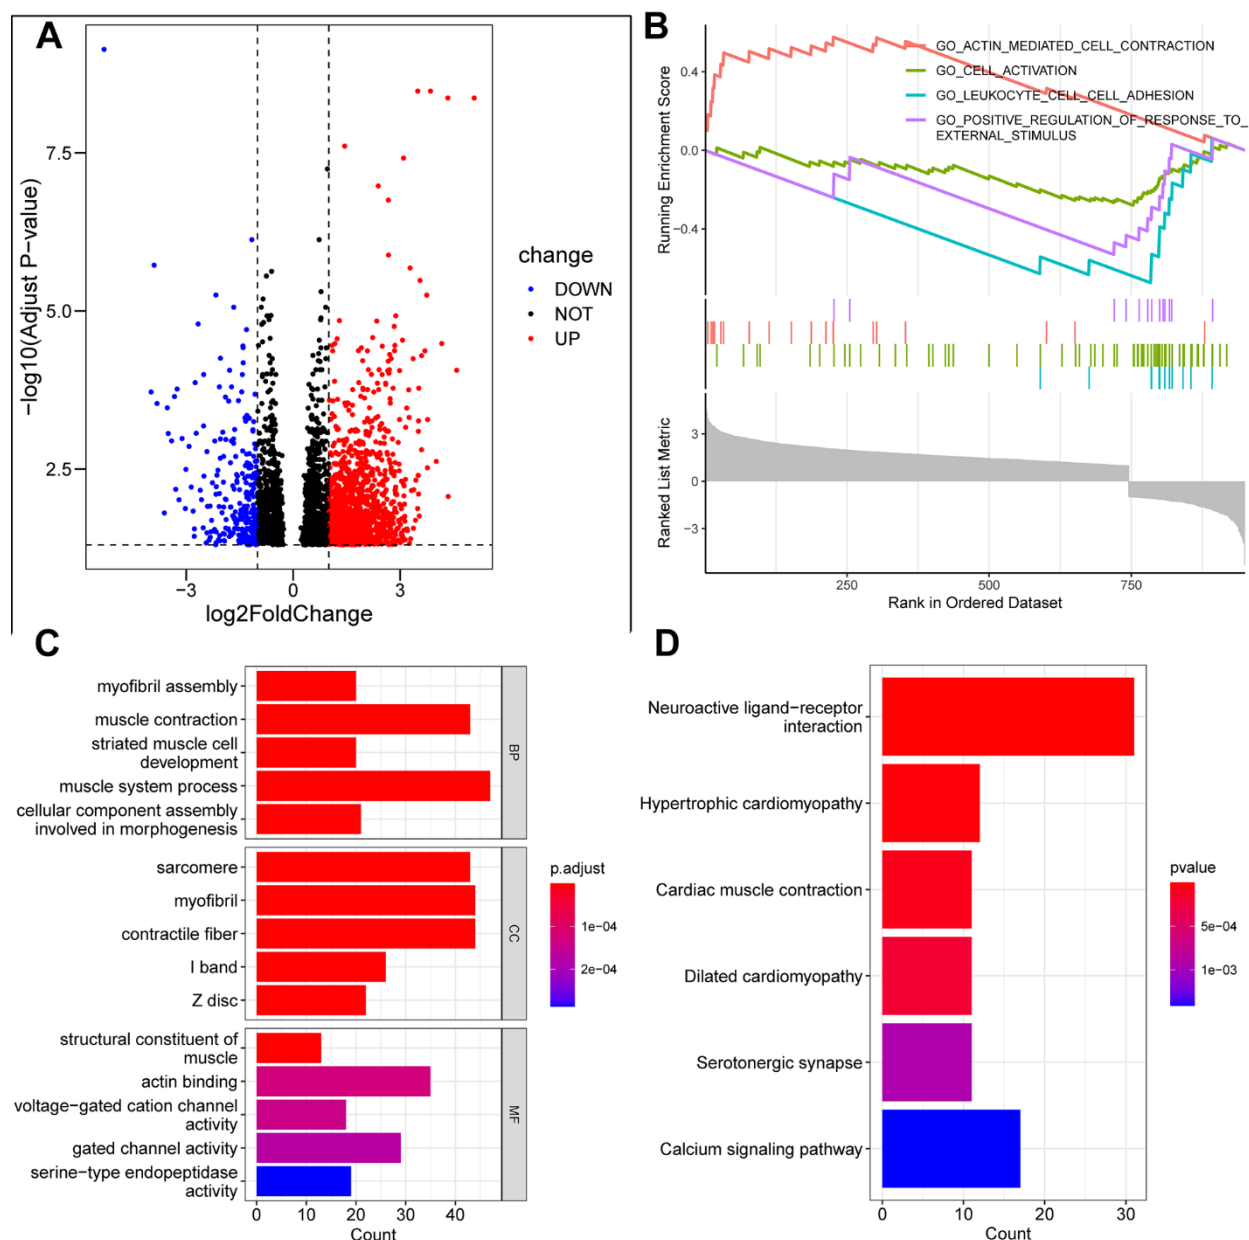

**Supplementary Figure 13. Enrichment analysis.** (A) Differential gene volcano map. (B) GSEA enrichment analysis. (C) GO enrichment analysis. (D) KEGG enrichment analysis.

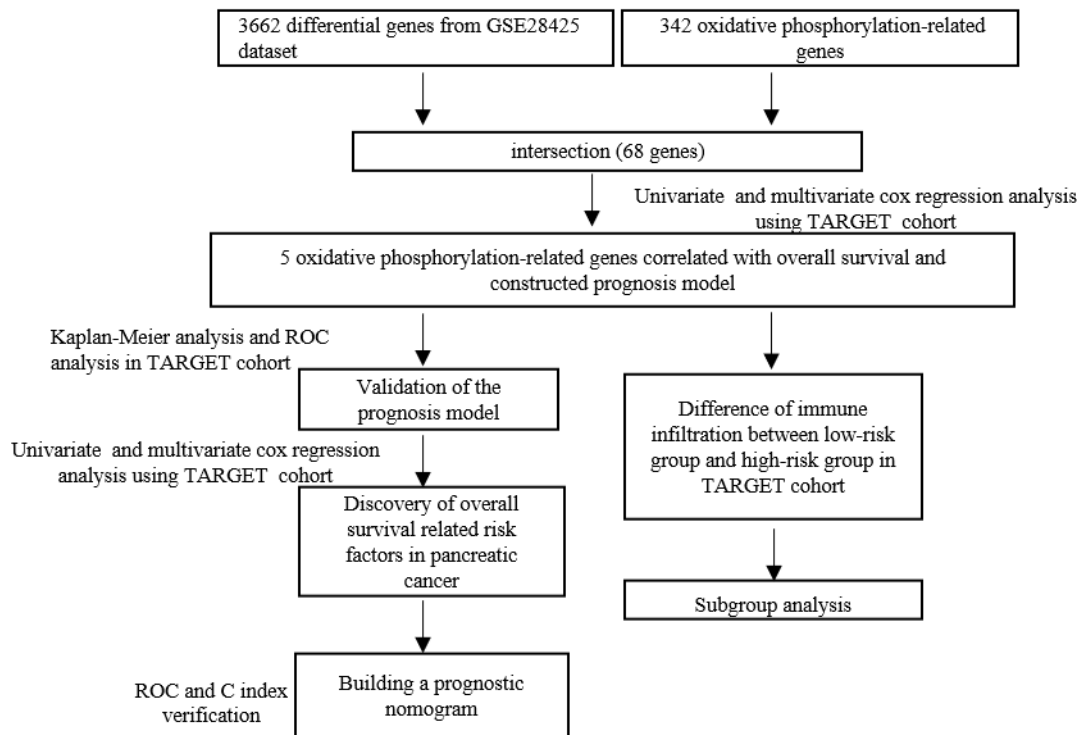

Supplementary Figure 14. Flow chart.
